# Supplementary material for: Porous Iron Electrodes Reduce Energy Consumption During Electrocoagulation of a Virus Surrogate: Insights into Performance Enhancements Using Three-Dimensional Neutron Computed Tomography
Source: PubMed Central journal article supplement (PMC11474953; doi:10.1021/acsestengg.4c00317), 2024-09-23
Supplement: ee4c00317_si_001.pdf [file ee4c00317_si_001.pdf]

# Supporting Information

1

## 2 **Porous Iron Electrodes Reduce Energy Consumption During Electrocoagulation** 3 **of a Virus Surrogate: Insights into Performance Enhancements Using Three-** 4 **Dimensional Neutron Computed Tomography**

5 Kyungho Kim<sup>1,\*</sup>, Cesar Castillo<sup>2</sup>, Gyoung G. Jang<sup>2</sup>, Yuxuan Zhang<sup>3</sup>, Costas Tsouris<sup>2</sup>,  
6 Shankararaman Chellam<sup>1</sup>

7 <sup>1</sup>Department of Civil & Environmental Engineering, Texas A&M University, College Station,  
8 Texas 77843, United States

9 <sup>2</sup>Manufacturing Science Division, Oak Ridge National Laboratory (ORNL), Oak Ridge,  
10 Tennessee 37831, United States

11 <sup>3</sup>Neutron Scattering Division, ORNL, Oak Ridge, Tennessee 37831, United States

12 \*Corresponding author: Kyungho Kim, Email: [kyunghokim@tamu.edu](mailto:kyunghokim@tamu.edu)

13 **Section S1. Synthetic Secondary Effluent Composition.** The synthetic solution used in this  
 14 study was prepared to closely simulate the actual secondary effluent water of two case studies  
 15 as shown below (Table S1).

16 **Table S1.** Water composition of two case studies of secondary effluent reuse and the formulated model  
 17 water for this project.

| Parameter                               | Case 1 <sup>1</sup> | Case 2 <sup>2,3</sup> | Synthetic secondary effluent in this study |
|-----------------------------------------|---------------------|-----------------------|--------------------------------------------|
| Chloride (mg/L)                         | 289                 | 285±21                | 346                                        |
| Sulfate (mg/L)                          | 268                 | 195±20                | 200                                        |
| Calcium (mg/L)                          | 78.3                | 79.7±4.5              | 75                                         |
| Magnesium (mg/L)                        | 18.8                | 28.6±2.9              | 25                                         |
| Silica (mg/L)                           | 45.0                | 20.3±1.5              | 30                                         |
| Sodium (mg/L)                           | 368                 | 225±15                | 225                                        |
| Hardness (mg/L as CaCO <sub>3</sub> )   | 253                 | 317±21                | 291.7                                      |
| Alkalinity (mg/L as CaCO <sub>3</sub> ) | 110                 | 202±15                | 59.3                                       |
| pH                                      | 7.0                 | 7.2±0.1               | 6.5                                        |
| Conductivity (µS/cm)                    | -                   | 1680±80               | 1550                                       |

18

19 **Section S2. Electrolysis Time Calculation.** The electrolysis time of 11.5 min to aim 20 mg/L Fe  
20 in 0.5 L synthetic water at 0.05 A was obtained based on Faraday's Law for batch EC Experiments  
21 with solid and porous foam electrodes as shown below.

$$22 \quad m = \frac{A_W \cdot I \cdot t}{z \cdot F}$$

23 where  $m$  is the mass of total Fe (g),  $A_W$  is the atomic weight of Fe (55.9 g/mol),  $I$  is the current (A  
24 or C/s),  $t$  is the electrolysis time (s),  $z$  is the number of electrons transferred (assumed to be 2)<sup>4</sup>,  
25 and  $F$  is the Faraday's constant (96,485 C/eq). Rearranging and solving the equation for  $t$  for 0.01  
26 g Fe (i.e., 20 mg/L for 0.5 L) with given parameter values yields,

$$27 \quad t = m \cdot \frac{z \cdot F}{A_W \cdot I} = (0.01 \text{ g}) \cdot \frac{2 \cdot \left(96485 \frac{\text{C}}{\text{mol}}\right)}{\left(55.9 \frac{\text{g}}{\text{mol}}\right) \cdot \left(0.05 \frac{\text{C}}{\text{s}}\right)} = 690 \text{ s or } 11.5 \text{ min}$$

28 Section S3. Batch Electrocoagulation Set-up with Cylindrical Porous Electrodes for  
29 Neutron Tomography

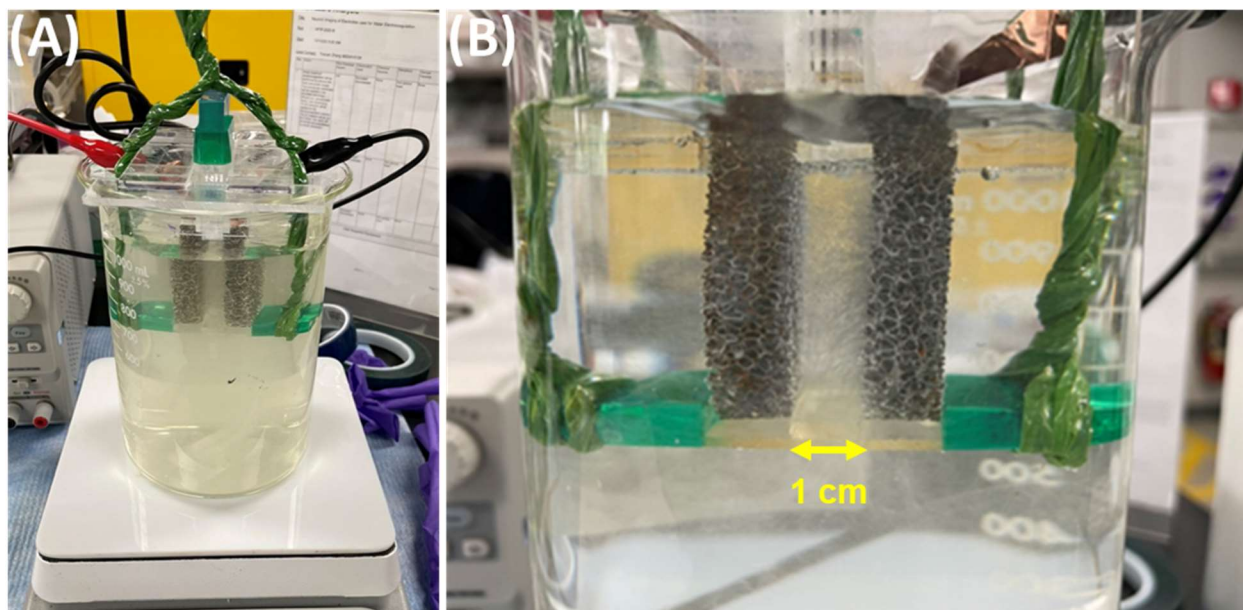

30  
31 **Figure S1.** Photos of electrocoagulation with a set of porous cylindrical electrodes. The overall setup is  
32 shown in (A), and the vertical placement of the electrodes is emphasized in (B).

33 Section S4. Images of Porous Foam Electrodes after Electrolysis

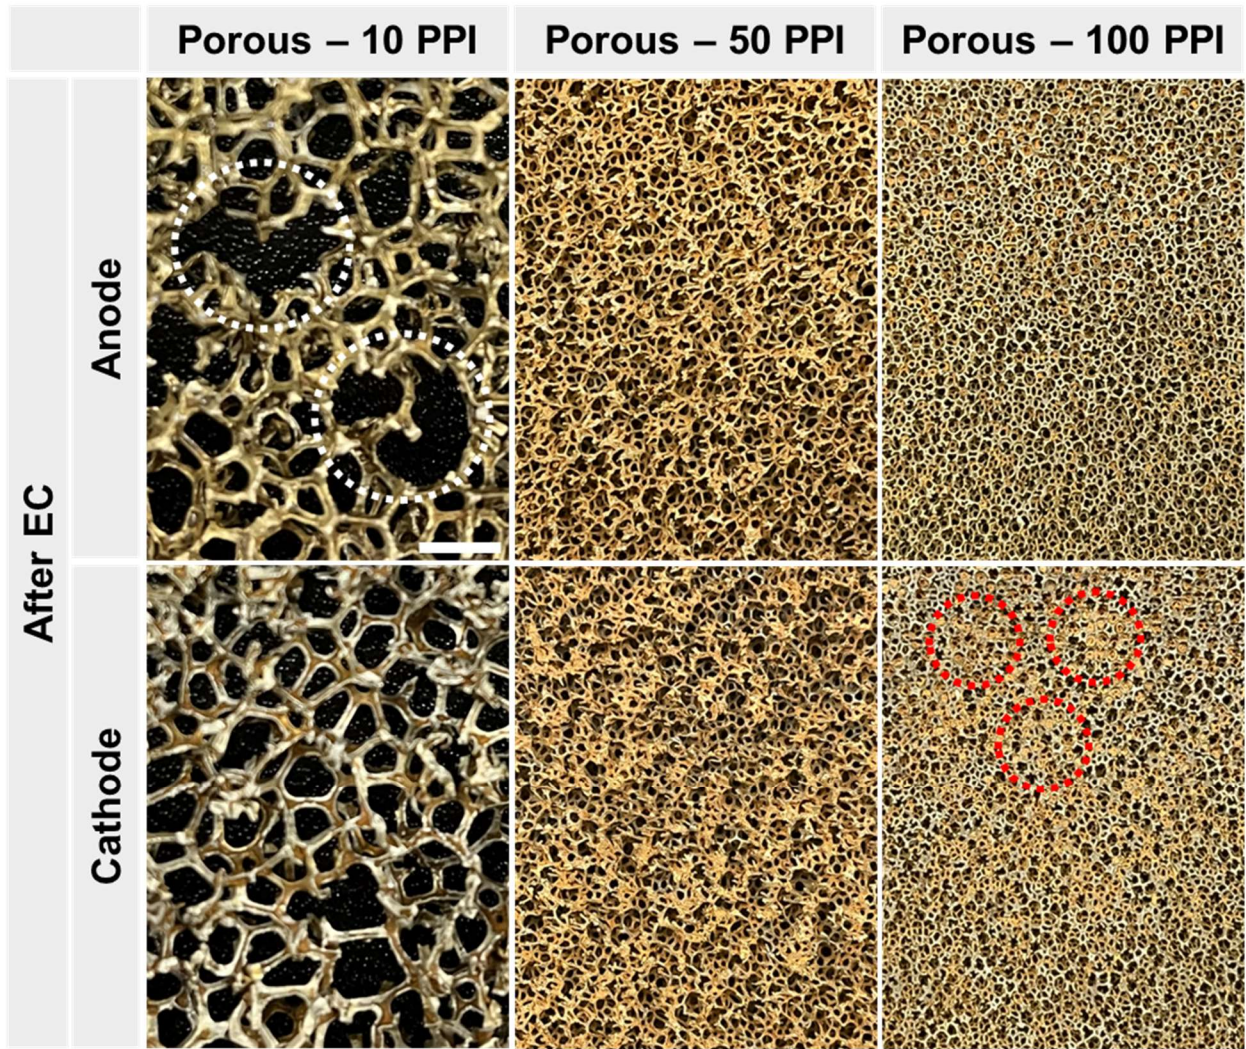

34  
35 **Figure S2.** Structural changes of porous electrodes. The scale bar in the top left image represents 5 mm  
36 and is shared by the other images.



37 Section S5. Additional Optical Microscopic Images of Solid Plate and Porous Foam  
38 Electrodes after Electrolysis

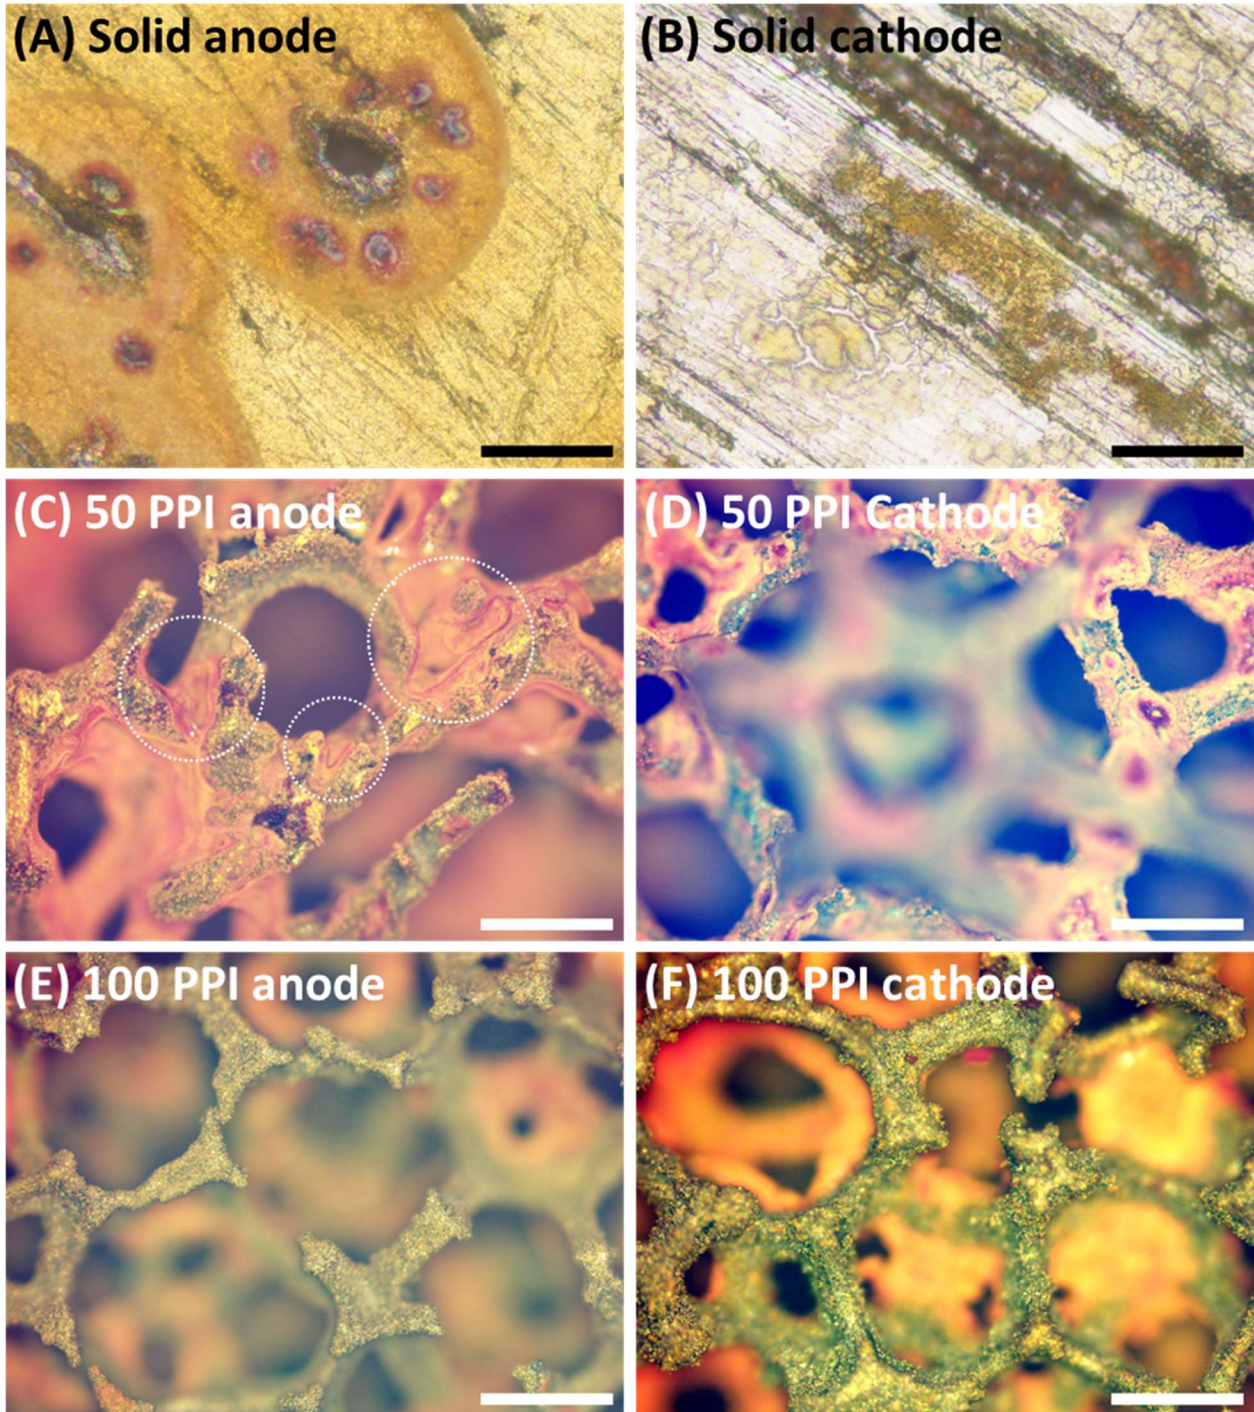

39  
40 **Figure S3.** (A) Solid plate anode after electrolysis illustrating pits (scale: 50  $\mu\text{m}$ ), (B) Solid plate cathode  
41 after electrolysis with light brown-colored deposits (scale: 50  $\mu\text{m}$ ), (C) Pits growing in irregular directions  
42 found on 50 PPI anode (white circles, scale: 50  $\mu\text{m}$ ), (D) Insignificant pore clogging in 50 PPI cathode (scale:

43 50  $\mu\text{m}$ ), (E) Relatively clean outer-layer pore structures of 100 PPI porous anode (scale: 500  $\mu\text{m}$ ) and (F)  
44 the similar feature of 100 PPI cathode (scale: 500  $\mu\text{m}$ ).



45 Section S6. Optical Microscopy Images of Porous Foam Cathodes Indicative of Chemical  
46 Dissolution

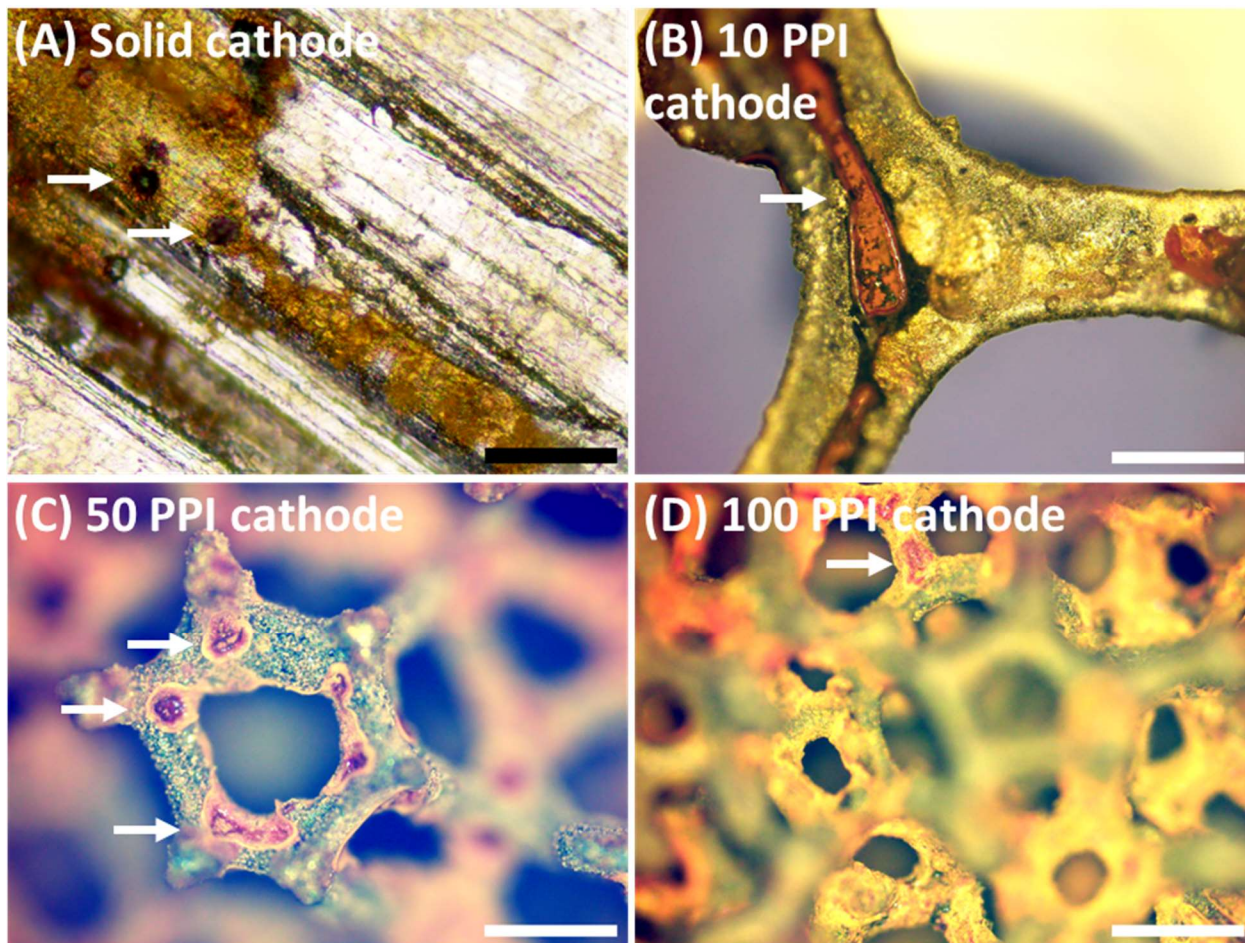

47  
48 **Figure S4.** Images of solid and porous cathode indicative of chemical dissolution. (A) Solid plate cathode  
49 (scale: 50  $\mu\text{m}$ ), (B) 10 PPI cathode (scale: 500  $\mu\text{m}$ ), (C) 50 PPI cathode (scale: 500  $\mu\text{m}$ ), and (D) 100 PPI  
50 cathode (scale: 500  $\mu\text{m}$ ).



51 **Section S7. Quantitative Analysis of Porous Cylindrical Electrodes using nCT**

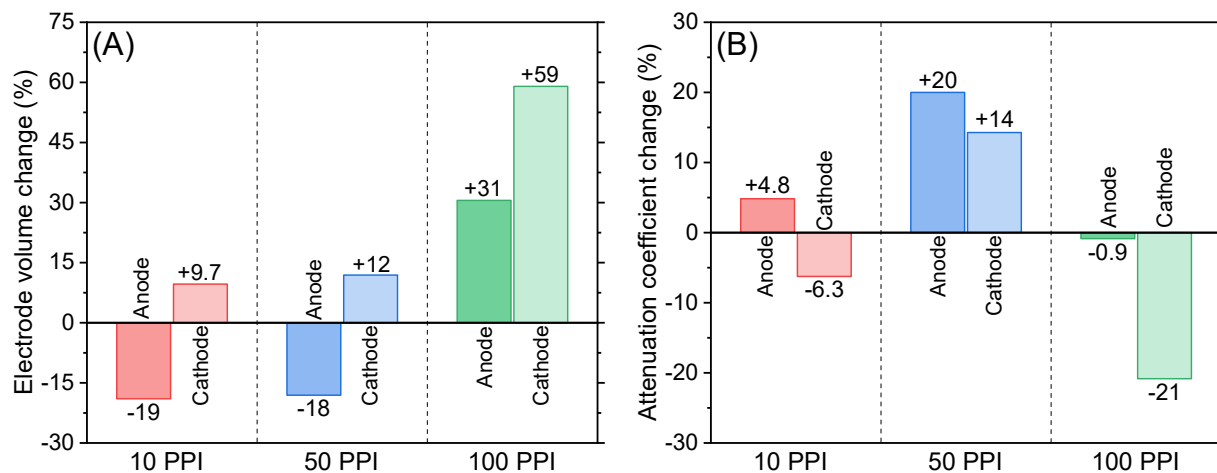

52 **Figure S5.** Changes in the physicochemical properties of porous anode and cathode before and after 40  
 53 min of electrolysis estimated by neutron tomography. (A) Overall electrode volume change. (B) Overall  
 54 attenuation coefficient change.  
 55

56 Quantitative data representing the entire electrode were extracted from the tomograms. The  
 57 relative total volume change after electrolysis was calculated with respect to the unused electrode  
 58 (Figure S5A). The total volume change of the 10 PPI anode was found to be -19% (i.e., volume  
 59 reduction by 19%) as expected given the sacrificial nature of the anode. The optical image is  
 60 shown in Figure 4B2 in the manuscript where irregular pits were occasionally seen, while surface  
 61 deposition was insignificant. About 10% volume increase of the 10 PPI cathode also coincided  
 62 with the visual observation of severe surface coverage observed in Figure 4B3 in the manuscript.  
 63 These observations were also in agreement with the mass change of the electrodes (Figure S6).  
 64 Similar trends were found with the 50 PPI electrodes. The 50 PPI anode lost 18% of its volume,  
 65 indicating a dominant impact of mass loss during the electrolysis over the patchy growth of  
 66 corrosion layers found by optical microscopy. The cathode volume increased by 12%, which was  
 67 somewhat unexpected given the only moderate surface deposition observed in Figure 4C3 in the  
 68 manuscript, which suggests that internal structures (not observable using the optical microscope)  
 69 might suffer more severe precipitate deposition. Interestingly, the 100 PPI anode and cathode  
 70 showed a substantial volume increase by 31 and 59%, respectively, well-matching the optical

71 microscopic observation of the exclusive pore-clogging deposits. Moreover, it should be noted  
72 that, unlike the other two cases of 10 and 50 PPI anodes, mass decline despite the volume  
73 increase was observed with the 100 PPI anode (Figure S6), suggesting a highly porous nature of  
74 iron precipitates (Figure S7).

75 The overall attenuation coefficient change was indicative of chemical alterations, not only by  
76 ferric oxyhydroxide but also by the deposition of other elements (Figure S5B). A slight increase in  
77 the attenuation coefficient of the 10 PPI anode was attributed to H in ferric oxyhydroxide  
78 overwhelming the low neutron attenuating O, while the opposite result of the cathode hinted the  
79 dominating effect of deposited elements with low attenuating coefficients on the overall value,  
80 counter-intuitive to the visual observation shown in Figure 4B3 in the manuscript. Based on the  
81 previous studies on  $\text{CaCO}_3$  and  $\text{Mg}(\text{OH})_2$  precipitate formation on the cathodic surface due to the  
82 locally basic pH environment<sup>5-7</sup>, a decrease in the overall coefficient of the cathode was attributed  
83 to C, O, Ca, and Mg whose attenuation coefficients are lower by several orders of magnitude than  
84 those of Fe and H<sup>8</sup>. A substantial increase in the coefficients of 50 PPI anode and cathode  
85 pronounced the deposition of hydrogenated substances, probably ferric oxyhydroxide, dominating  
86 other low-attenuating elements like Ca, Mg, and Si, especially on the cathode (Figure 8 in the  
87 manuscript). 100 PPI anode showed only marginal change in the overall coefficient, which was  
88 rationalized by the concurrent accumulation of low-neutron-attenuating elements such as Si  
89 compensating coefficient increase by H in ferric hydroxide (Figure 8 in the manuscript). A  
90 substantial decline of attenuation coefficient, particularly for the cathode, by 21% suggested a  
91 dominating impact of  $\text{CaCO}_3$  and  $\text{Mg}(\text{OH})_2$  deposition that was not visually identifiable (Figure  
92 4D3 in the manuscript).

93 Section S8. Cylindrical Porous Electrode Mass Change

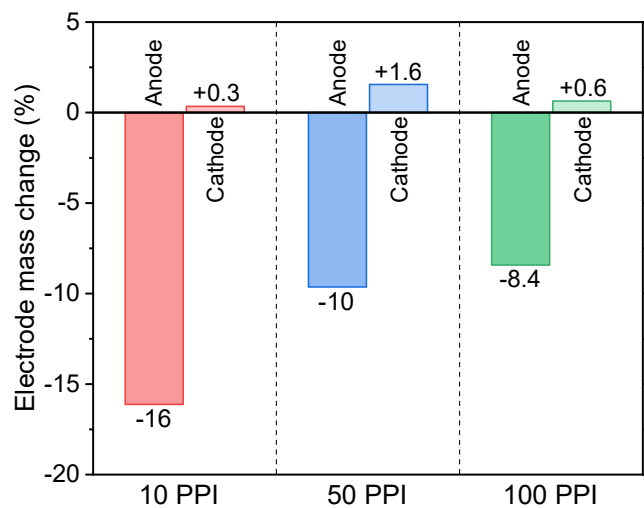

94  
95

Figure S6. Relative change in porous electrode mass induced by 40 min electrocoagulation.



96 **Section S9. SEM of cylindrical 100 PPI anode before and after EC.**

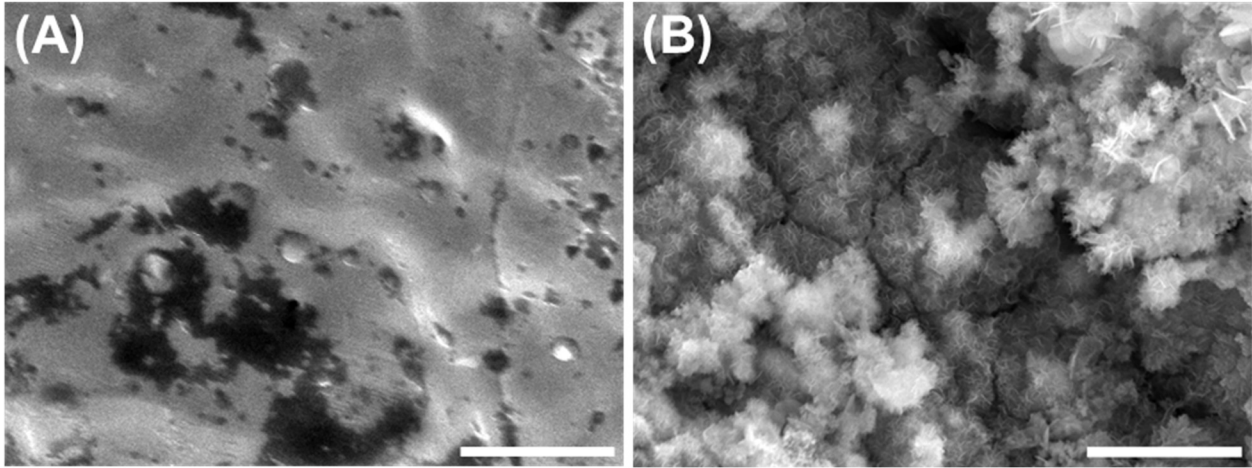

97 **Figure S7.** Highly porous nature of surface deposits found on cylindrical 100 PPI anode after 40 minutes  
98 of electrocoagulation operation; Before (A) and after (B) electrocoagulation. Scale bars represent 5  $\mu\text{m}$ .  
99

100 **Section S10. Relative Changes of Electrode Volume and Attenuation Coefficient Estimated**  
101 **by Neutron Tomograms of Cylindrical Porous Electrodes**

102

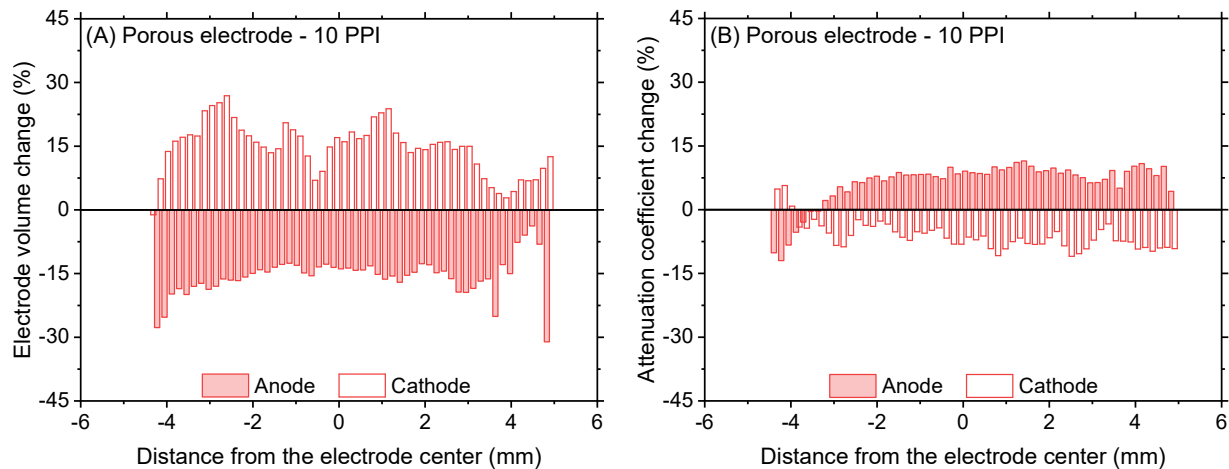

103

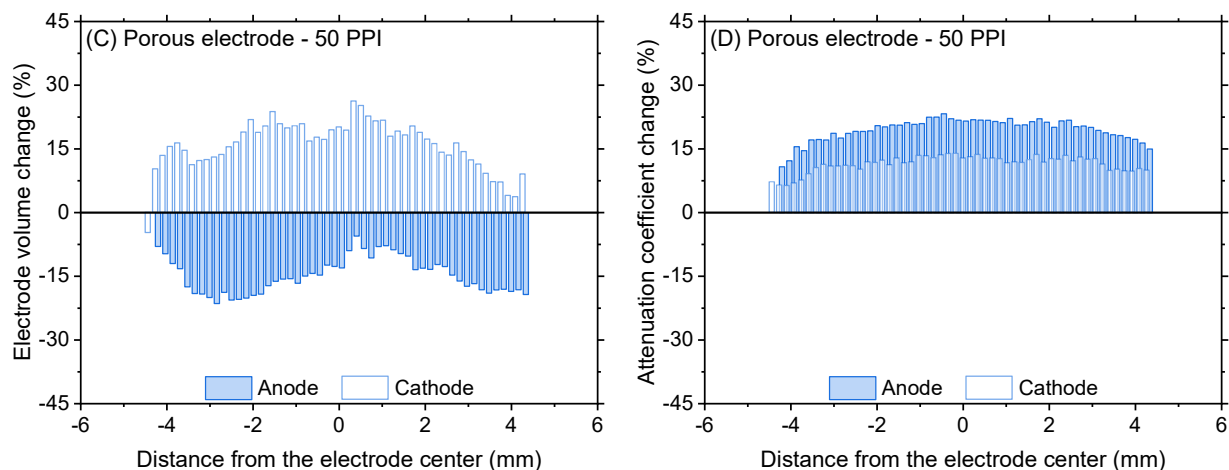

104

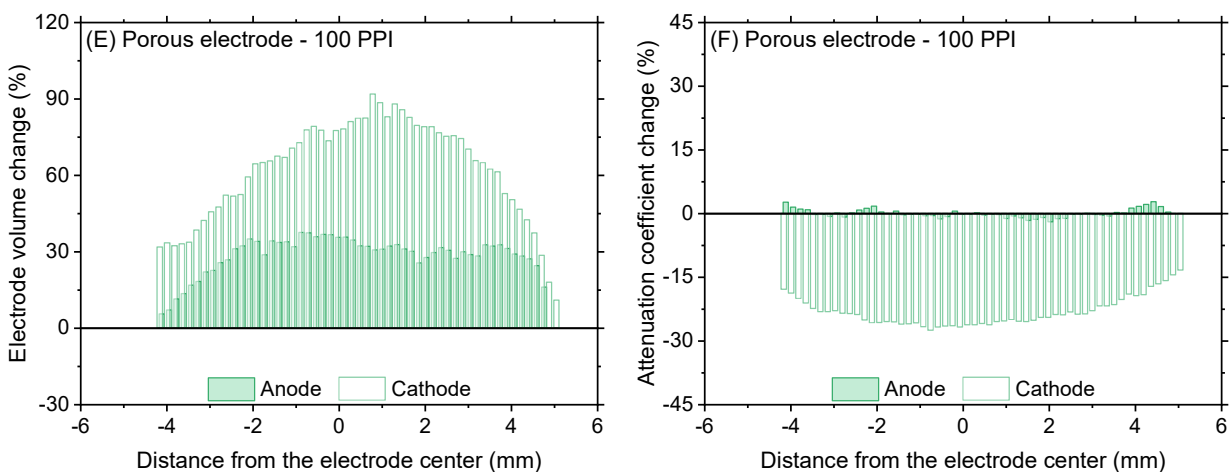

105 **Figure S8.** Relative changes of electrode volume and neutron attenuation coefficient before and after  
106 electrocoagulation along the electrode thickness.

107 Section S11. Electrical Energy Consumption Comparison between Solid and Porous  
 108 Electrodes in a Flow-through Electrocoagulation System

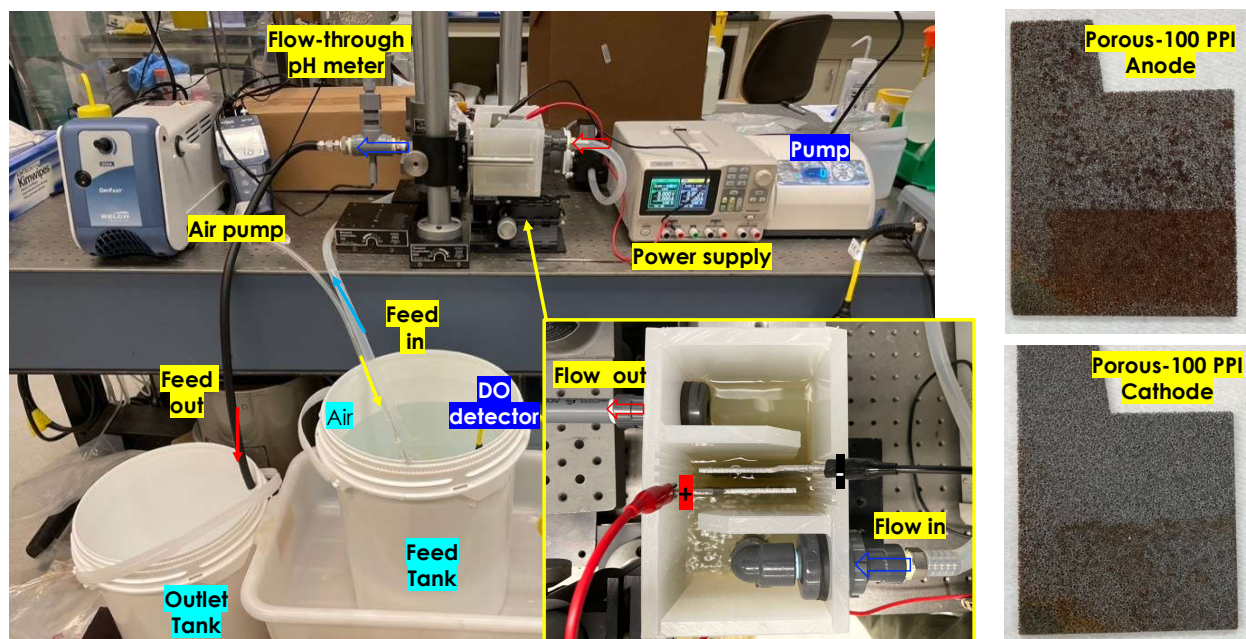

109 **Figure S9.** Continuous flow-through electrocoagulation operation. The yellow-boxed inset depicts details  
 110 of the reactor wherein electrodes were placed. The photo on the right shows the iron foam electrodes after  
 111 EC with 0.5 L/min of flowrate at 10 mA/cm<sup>2</sup>.  
 112

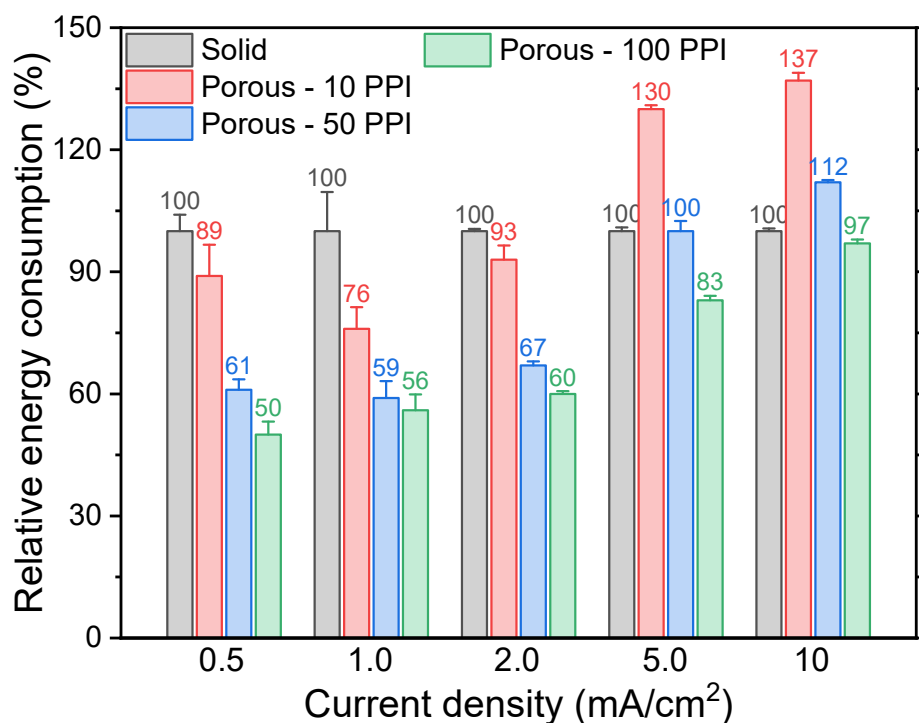

113 **Figure S10.** Relative electrical energy consumption with porous electrodes at different current densities  
 114 with respect to the solid electrode when electrocoagulation was performed in a batch operation 'in a flow-  
 115 through reactor system'. Averages and standard deviations are represented.  
 116



117 **References**

118 (1) Abada, B.; Joag, S.; Alspach, B.; Bustamante, A.; Chellam, S. Inorganic and Organic Silicon Fouling of  
119 Nanofiltration Membranes during Pilot-Scale Direct Potable Reuse. *ACS ES&T Engineering* **2023**, *3* (9),  
120 1413-1423. DOI: 10.1021/acsestengg.3c00172.

121 (2) Abada, B.; Safarik, J.; Ishida, K. P.; Chellam, S. Surface characterization of end-of-life reverse osmosis  
122 membranes from a full-scale advanced water reuse facility: Combined role of bioorganic materials and  
123 silicon on chemically irreversible fouling. *Journal of Membrane Science* **2022**, *653*, 120511. DOI:  
124 10.1016/j.memsci.2022.120511.

125 (3) Abada, B.; Safarik, J.; Ishida, K. P.; Chellam, S. Elucidating Foulant Diversity during Full-Scale Potable  
126 Reuse: Forensic Analysis of Lead and Lag Elements of a Three-Stage Reverse Osmosis System. *ACS*  
127 *ES&T Engineering* **2022**, *2* (11), 2116-2129. DOI: 10.1021/acsestengg.2c00171.

128 (4) Lakshmanan, D.; Clifford, D. A.; Samanta, G. Ferrous and ferric ion generation during iron  
129 electrocoagulation. *Environmental Science & Technology* **2009**, *43* (10), 3853-3859. DOI:  
130 10.1021/es8036669.

131 (5) Müller, S.; Behrends, T.; van Genuchten, C. M. Sustaining efficient production of aqueous iron during  
132 repeated operation of Fe(0)-electrocoagulation. *Water Research* **2019**, *155*, 455-464. DOI:  
133 10.1016/j.watres.2018.11.060.

134 (6) Yang, Q.; Xu, L.; He, Q.; Wu, D. Reduced cathodic scale and enhanced electrochemical precipitation of  
135 Ca<sup>2+</sup> and Mg<sup>2+</sup> by a novel fenced cathode structure: Formation of strong alkaline microenvironment and  
136 favorable crystallization. *Water Research* **2021**, *209*, 117893. DOI: 10.1016/j.watres.2021.117893.

137 (7) James, M.; Mitch, W. A. Electrochemical generation of hydroxide for precipitative water softening. *ACS*  
138 *ES&T Water* **2022**, *2* (12), 2677-2685. DOI: 10.1021/acsestwater.2c00451.

139 (8) Bacon, G. E.; Lonsdale, K. Neutron diffraction. *Reports on Progress in Physics* **1953**, *16* (1), 1. DOI:  
140 10.1088/0034-4885/16/1/301.

141
